# Supplementary material for: Pangenome reconstruction in rats enhances genotype-phenotype mapping and novel variant discovery
Source: PubMed Central journal article supplement (PMC10802574; doi:10.1101/2024.01.10.575041), 2024-01-11
Supplement: NIHPP2024.01.10.575041v1-supplement-1.pdf [file NIHPP2024.01.10.575041v1-supplement-1.pdf]

## Supplementary Information

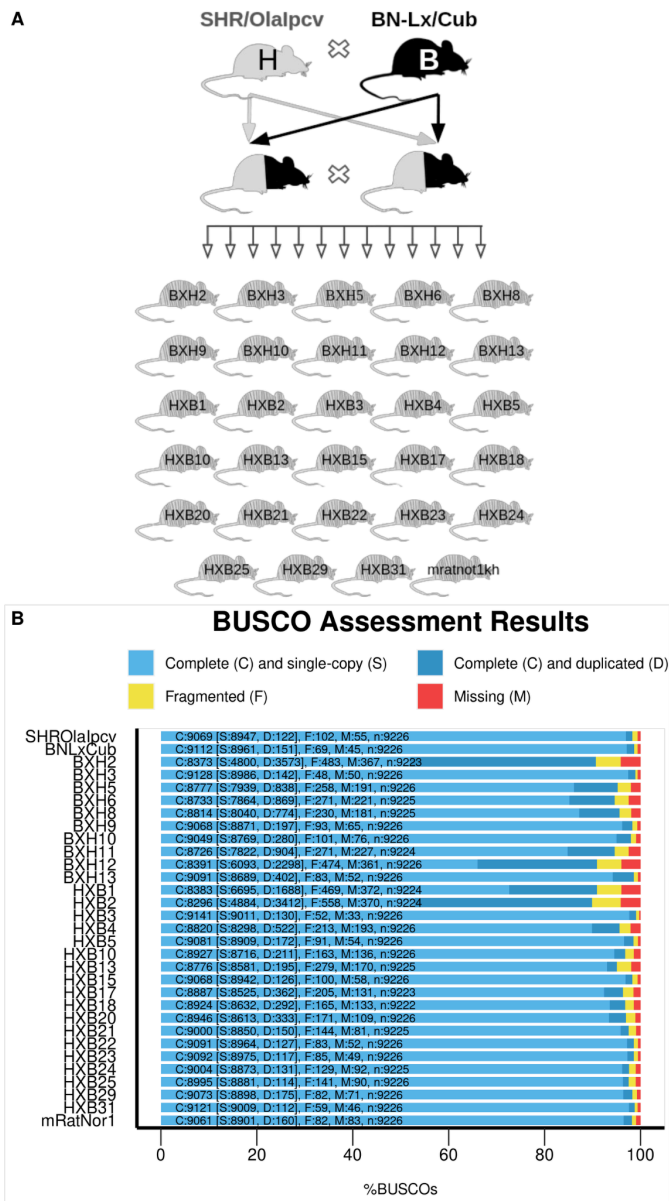

**Figure S1. Description of rats used in this study and quality of the genome assembly.**

(A) Overview of the HXB/BXH recombinant inbred rat family describing the origins and breeding history of the HXB/BXH rats. (B) BUSCO completeness of the genome assembly used to build the pangenome for genomics data quality control. Bar charts show proportions classified as complete (C, blues), complete single-copy (S, light blue), complete duplicated (D, dark blue), fragmented (F, yellow), and missing (M, red).

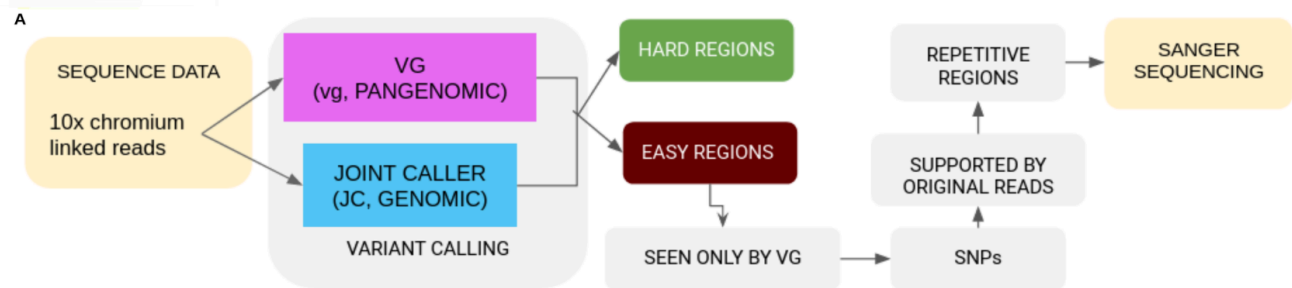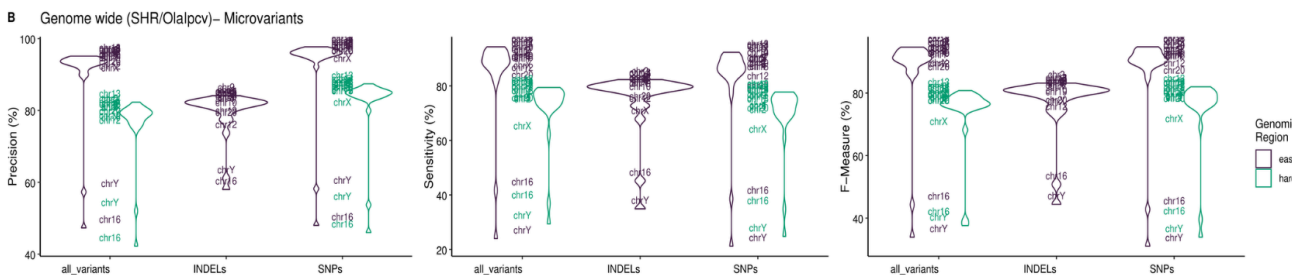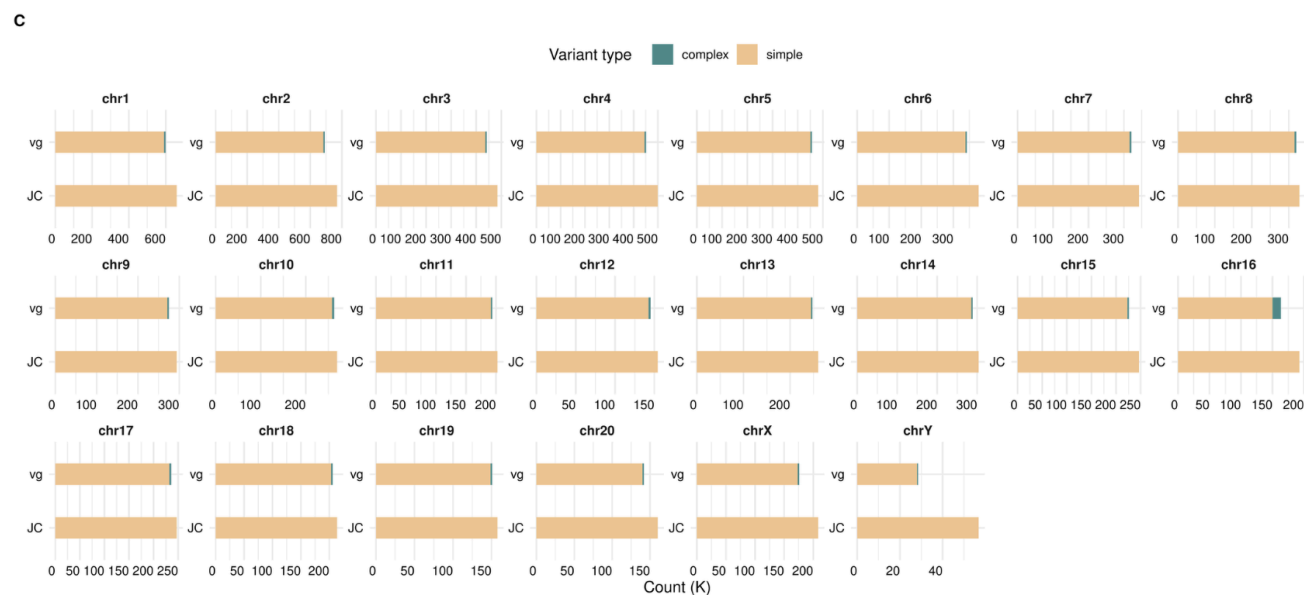

**D** easy region

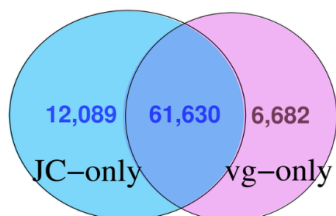

**E** vg-only

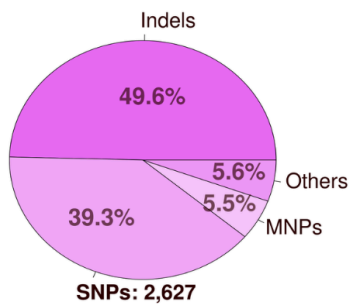

**F** SNPs

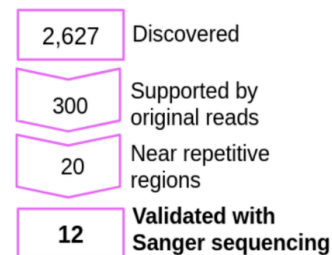

**Figure S2. Validation in the SHR/Olapavic sample of the small variants called from the genome graph using vg.** Small variants were validated over the JC call set (gold standard) in the SHR/Olapcv sample according to the scheme in (A). (B) Genome-wide accuracy of vg calls is ~100% in the easy regions for SNPs, ~90% in the easy regions and ~80% in the easy regions for Indels and hard regions of the genome. Exceptions are seen for chromosomes 16 and Y, which are enriched for complex variation (C). Validation through Sanger sequencing was restricted to easy regions (D), to SNPs (E) supported by original reads and in challenging, repetitive regions (F).

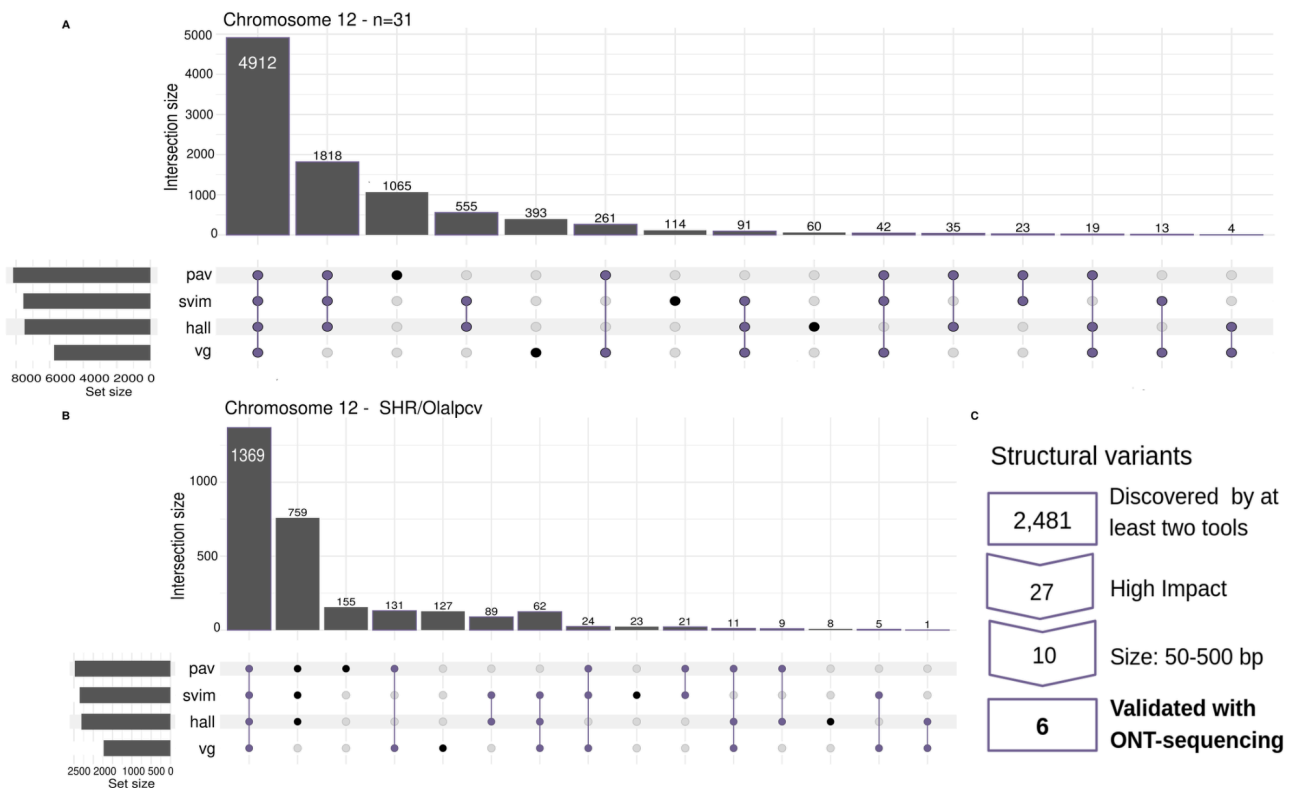

**Figure S3. Validation in the SHR/Olapavic sample of the Structural Variants (SVs) called from the genome graph using vg.** (A) Overlap of the call sets obtained by the three assembly-based methods (pav, svim, hall), and the graph-based method (vg) for chromosome 12 using the data from all rats. (B) Same as (A) for SHR/Olapcv only. (C) Scheme of the validation for SVs

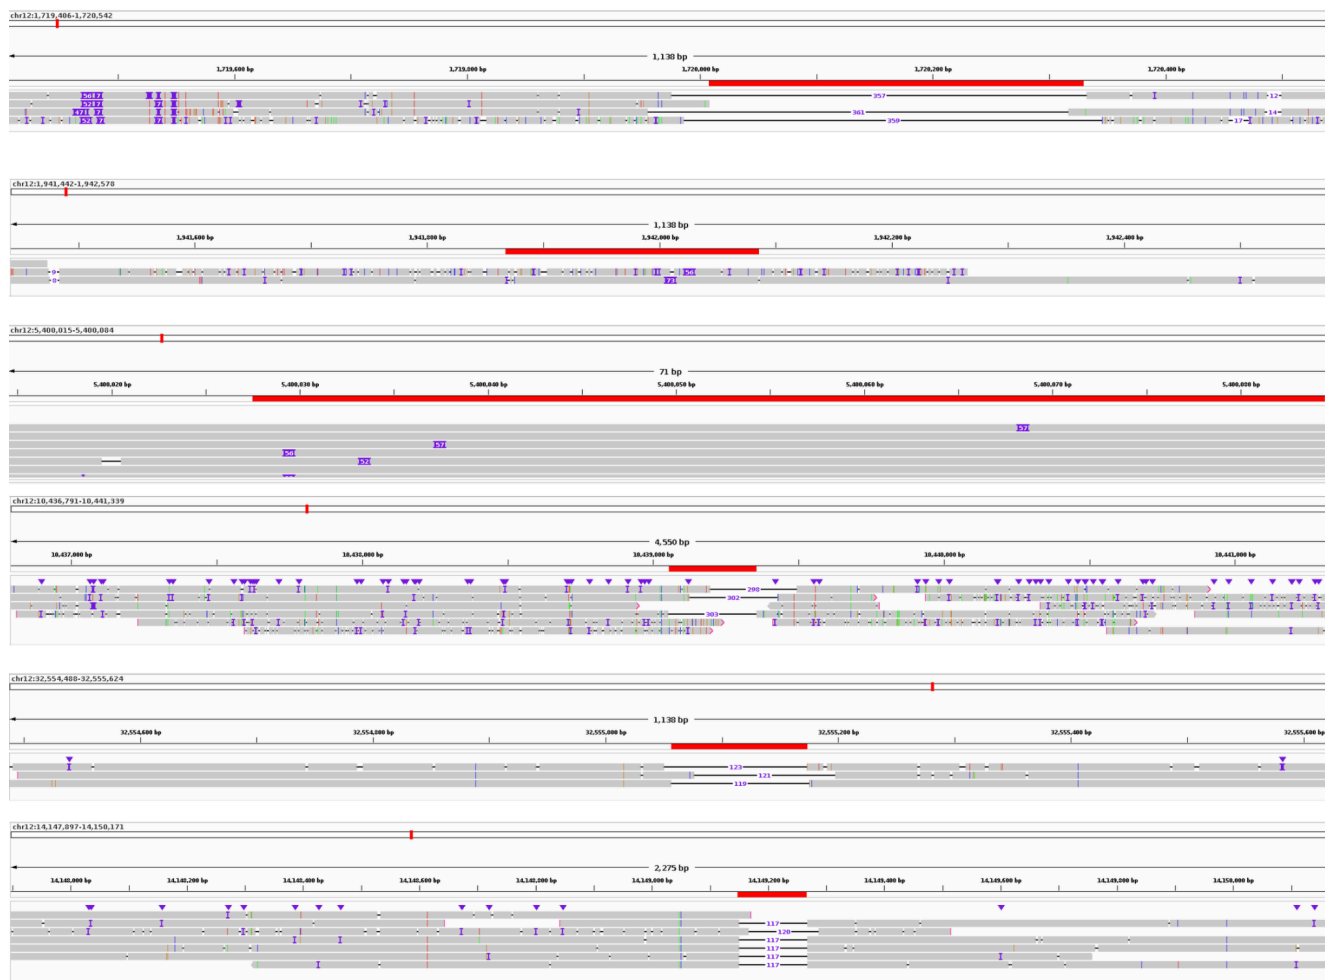

**Figure S4. Integrated Genomic View of the validated SVs.** For each SV gray bars are validated reads mapped against the mRatBN7.2/rn7.fa reference genome, red bars define the boundaries of the SV.

Supplementary tables: [Supplementary Tables](#)
